# Supplementary material
Source: publisher figshare collection journal article supplement (https://acs.figshare.com/ndownloader/files/5820372)
Supplement: Supplementary file 1 [file 5820372]

Supporting Information. Shim et al.

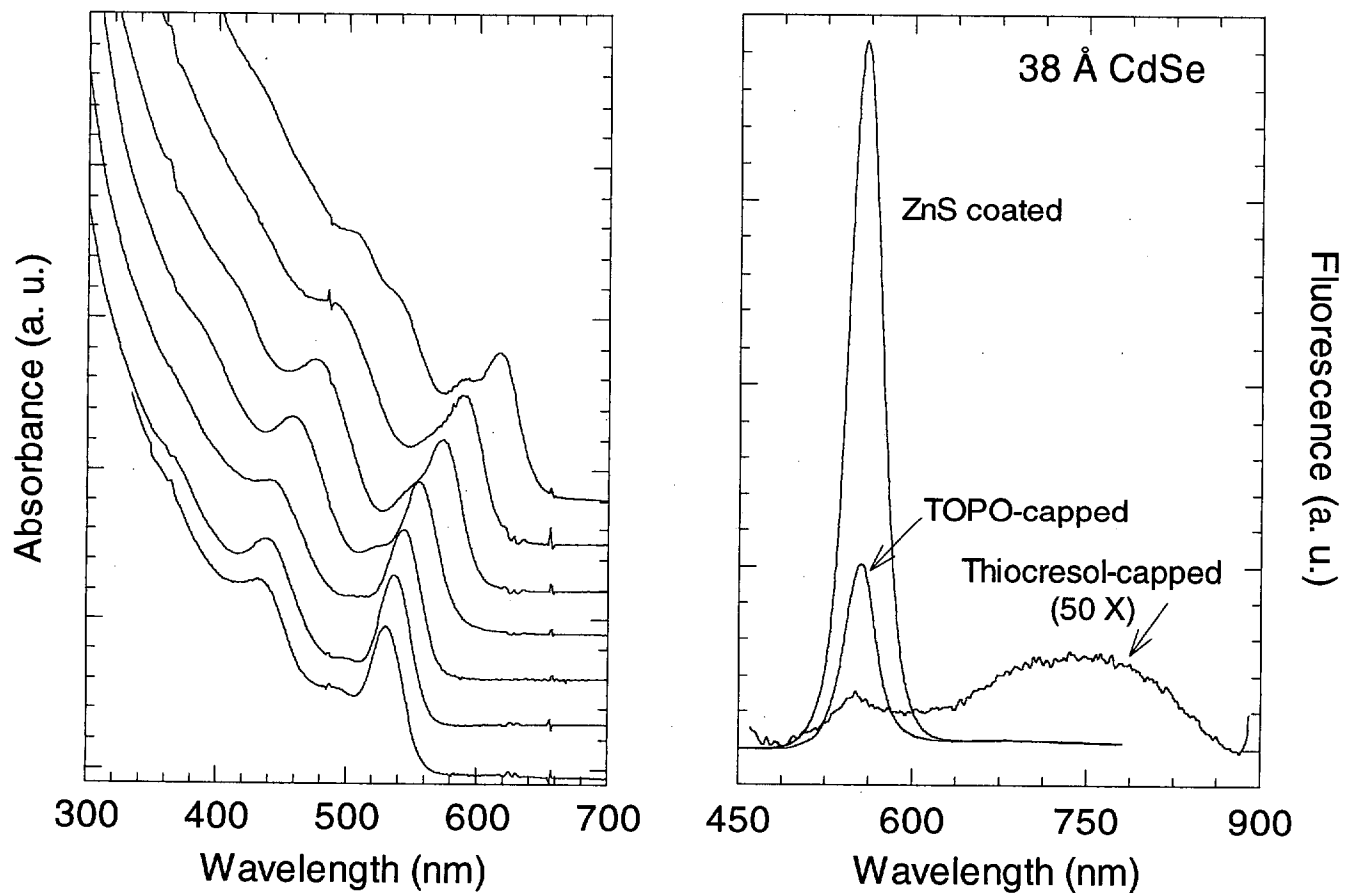

**Supporting Figure:** Absorption and fluorescence spectra of samples studied. The absorption spectra are those of TOPO-capped CdSe nanocrystals.
